# Supplementary material for: High Dependency Renal Unit (HDRU) for the management of COVID-19 in patients with severe acute or chronic kidney disease
Source: Research Square preprint supplement (doi:10.21203/rs.3.rs-235961/v1), 2021-03-01
Supplement: Supplementary file 1 [file 863fb8a9e69c4064a21cc98a.docx]

**Supplementary figure 2: Kaplan-Meier survival curves for ESRD in pre-HDRU and HDRU groups**

P<0.01
