# Supplementary material for: High Dependency Renal Unit (HDRU) for the management of COVID-19 in patients with severe acute or chronic kidney disease
Source: Research Square preprint supplement (doi:10.21203/rs.3.rs-235961/v1), 2021-03-01
Supplement: Supplementary file 1 [file b4089514c05b9d87515dd0f1.docx]

**Supplementary Table 2: Predictors of survival for AKI-D and ESRD groups**

| Predictors of survival | | | | | | | | |
| --- | --- | --- | --- | --- | --- | --- | --- | --- |
|  | B | S.E. | Wald | df | Sig. | Exp(B) | 95% C.I. for EXP(B) | |
|  |  |  |  |  |  |  | Upper | Lower |
| Predictors of survival in AKI-D | | | | | | | | |
| Shock at presentation | -4.316 | 1.575 | 7.508 | 1 | .006 | .013 | .001 | .293 |
| Total Leukocyte Count >10,000 (cells x106/L) | 2.619 | 1.095 | 5.723 | 1 | .017 | 13.717 | 1.605 | 117.221 |
| Shock during stay | 4.603 | 1.147 | 16.111 | 1 | .000 | 99.815 | 10.544 | 944.926 |
| Predictors of survival in ESRD | | | | | | | | |
| Shock at presentation | 2.893 | 1.491 | 3.764 | 1 | .052 | 18.048 | 335.576 | .971 |
| Altered mental status | 4.916 | 1.745 | 7.941 | 1 | .005 | 136.520 | 4171.384 | 4.468 |
| COVID Stage | 2.703 | 1.228 | 4.847 | 1 | .028 | 14.927 | 165.620 | 1.345 |
| Shock during stay | 2.191 | 1.039 | 4.448 | 1 | .035 | 8.940 | 68.463 | 1.167 |
| Requirement of PCV transfusions | -1.518 | .794 | 3.658 | 1 | .056 | .219 | 1.038 | .046 |
| Predictors of survival in AKI-D and ESRD groups combined | | | | | | | | |
| Gender | -1.037 | .473 | 4.801 | 1 | .028 | .354 | .140 | .896 |
| Breathlessness | 1.598 | .498 | 10.286 | 1 | .001 | 4.943 | 1.862 | 13.125 |
| Altered mental status | 1.921 | .638 | 9.052 | 1 | .003 | 6.827 | 1.953 | 23.860 |
| Total Leukocyte Count >10,000 (cells x106/L) | 1.338 | .453 | 8.737 | 1 | .003 | 3.811 | 1.569 | 9.252 |
| Shock during stay | 2.189 | .482 | 20.628 | 1 | .000 | 8.924 | 3.470 | 22.948 |
