# Supplementary material for: High Dependency Renal Unit (HDRU) for the management of COVID-19 in patients with severe acute or chronic kidney disease
Source: Research Square preprint supplement (doi:10.21203/rs.3.rs-235961/v1), 2021-03-01
Supplement: Supplementary file 2 [file 8dba4e037d309e40aa656576.docx]

**Supplementary Table 1: Hypoxia management for severe COVID-19**

| Maximal oxygen requirement during stay | AKI-D | ESRD |
| --- | --- | --- |
| Nasal prongs | 6 (5.2%) | 4 (3.9%) |
| Face Mask | 7 (6.0%) | 13 (11.0%) |
| Non-rebreathing mask | 21 (18.1%) | 30 (25.4%) |
| Non Invasive Ventilation | 22 (18.9%) | 16 (13.6%) |
| Invasive ventilation | 14 (12.1%) | 0 (0%) |
